# Supplementary material for: Inconsistencies between alcohol screening results based on AUDIT-C scores and reported drinking on the AUDIT-C questions: prevalence in two US national samples
Source: PubMed Central journal article supplement (PMC3946205; doi:10.1186/1940-0640-9-2), 2014-01-27
Supplement: 1940-0640-9-2-S1.pdf [file 1940-0640-9-2-S1.pdf]

**Appendix A. Sensitivity and Specificity of AUDIT-C for Identifying Unhealthy Alcohol Use (Clinical Samples) or Drinking Above U.S. Recommended Limits (NESARC)**

|          | VA Outpatient Population*<br>(standard AUDIT-C) |               | Non-VA Outpatient Population†<br>(standard AUDIT-C) |               | U.S. General Population‡<br>(NESARC AUDIT-C) |               |
|----------|-------------------------------------------------|---------------|-----------------------------------------------------|---------------|----------------------------------------------|---------------|
|          | Sensitivity %                                   | Specificity % | Sensitivity %                                       | Specificity % | Sensitivity %                                | Specificity % |
| Women    |                                                 |               |                                                     |               |                                              |               |
| $\geq 2$ | 81                                              | 96            | 89                                                  | 78            | --                                           | --            |
| $\geq 3$ | 60                                              | 96            | 73                                                  | 91            | 96                                           | 80            |
| $\geq 4$ | 38                                              | 98            | 57                                                  | 96            | 81                                           | 93            |
| Men      |                                                 |               |                                                     |               |                                              |               |
| $\geq 3$ | 95                                              | 60            | 92                                                  | 79            | 100                                          | 58            |
| $\geq 4$ | 86                                              | 72            | 86                                                  | 89            | 99                                           | 79            |
| $\geq 5$ | 68                                              | 90            | 72                                                  | 96            | 91                                           | 95            |

\*Bradley, 2003 Criterion standard was unhealthy alcohol use (using DSM-IV criteria for AUD); Bush, 1998 (using DSM-III-R criteria for AUD)

†Bradley, 2007 Criterion standard was unhealthy alcohol use (DSM-IV criteria for AUD)

‡Dawson, 2005b Criterion standard was drinking above U.S. Recommended Limits
